# Supplementary material for: miR-151a induces partial EMT by regulating E-cadherin in NSCLC cells
Source: PubMed Central journal article supplement (PMC5541717; doi:10.1038/oncsis.2017.66), 2017-07-31

**Supplementary Figure S3: Verification of miR-151a over-expression and neutralization of miR-151a in NSCLC cells.** The relative quantity (RQ) of miR-151a (left panel) and RhoGDIA mRNA (right panel) was determined by RT-qPCR in A549s stably expressing miR-CTL, miR-151a or anti-miR-151a (miR-151a: n=3, \*\*\*\* $p$ <0.0001 (miR-151a), \*\*\*\* $p$ <0.0001 (anti-miR-151a), RhoGDIA: n=3, \*\*\*\* $p$ <0.0001 (miR-151a), \* $p$ =0.0107 (anti-miR-151a)). Shown as mean  $\pm$  SEM. Statistical significance was assessed using unpaired student's t-test with  $p$ -values 0.05 considered significant.

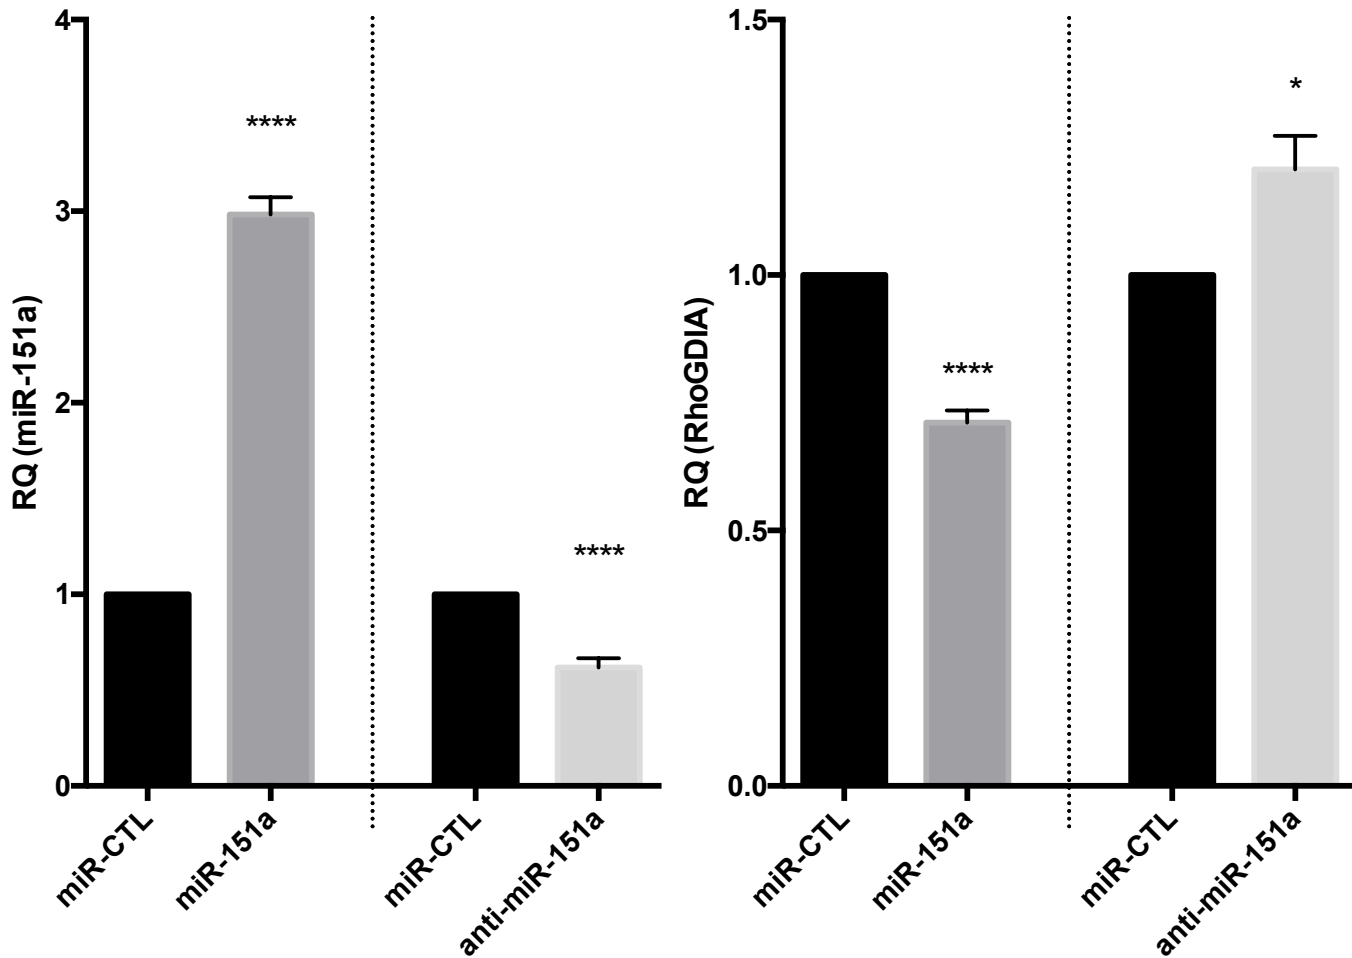

Supplement: oncsis201766x3.pdf [file oncsis201766x3.pdf]
