# Supplementary material for: miR-151a induces partial EMT by regulating E-cadherin in NSCLC cells
Source: PubMed Central journal article supplement (PMC5541717; doi:10.1038/oncsis.2017.66), 2017-07-31

**Supplementary Figure S4: miR-151a specifically affects NSCLC growth.** Growth analysis of A549s stably (A) or transiently (B) expressing miR-CTL, miR-151a or anti-miR-151a counted 96 hours after plating (n=3, \*\* $p=0.005$  (transduced miR-151a), \*\* $p=0.0045$  (transduced anti-miR-151a), \* $p=0.0472$  (transfected miR-151a), \* $p=0.0366$  (transfected anti-miR-151a). (C) A549s stably expressing miR-CTL, anti-miR-151a or both miR-151a and anti-miR-151a counted 96 hours after plating (n=3, \*\*\*\* $p=0.0001$  (anti-miR-151a)). (D) hLECs stably expressing miR-CTL, miR-151a, or anti-miR-151a counted 96 hours after plating (n=1). All graphs are shown as mean  $\pm$  SEM at the 96 hr time point. Statistical significance was assessed using unpaired student's t-test with  $p$ -values 0.05 considered significant.

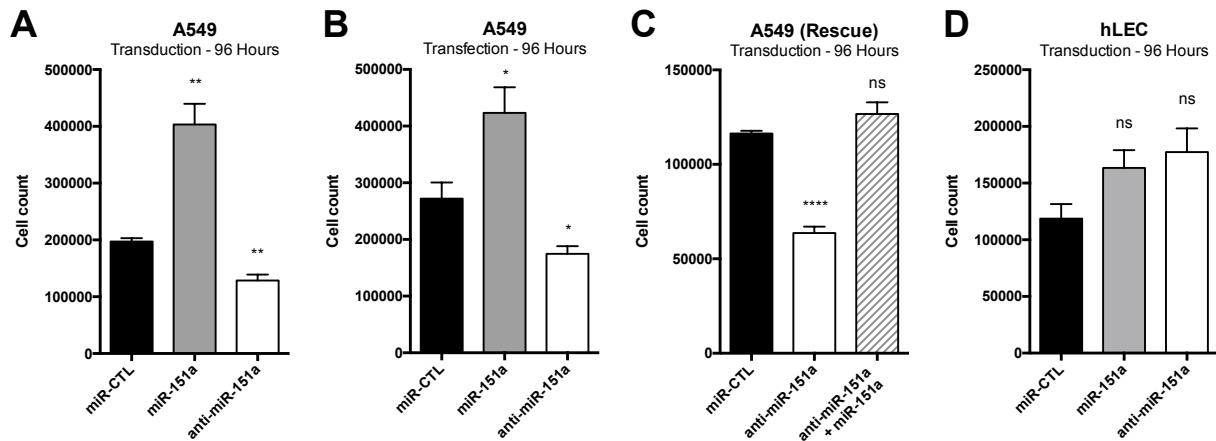

Supplement: oncsis201766x4.pdf [file oncsis201766x4.pdf]
