# Supplementary material for: miR-151a induces partial EMT by regulating E-cadherin in NSCLC cells
Source: PubMed Central journal article supplement (PMC5541717; doi:10.1038/oncsis.2017.66), 2017-07-31

**Supplementary Figure S6: miR-151a induces a mesenchymal-like phenotype in NSCLC.** Images of A549 cells stably expressing miR-151a or anti-miR-151a. Bright field (first column), GFP expression (second column) and overlay (third column). Scale = 500 m. The relative proportion of mesenchymal, epithelial, or undefined cells were quantified and shown as pie charts.

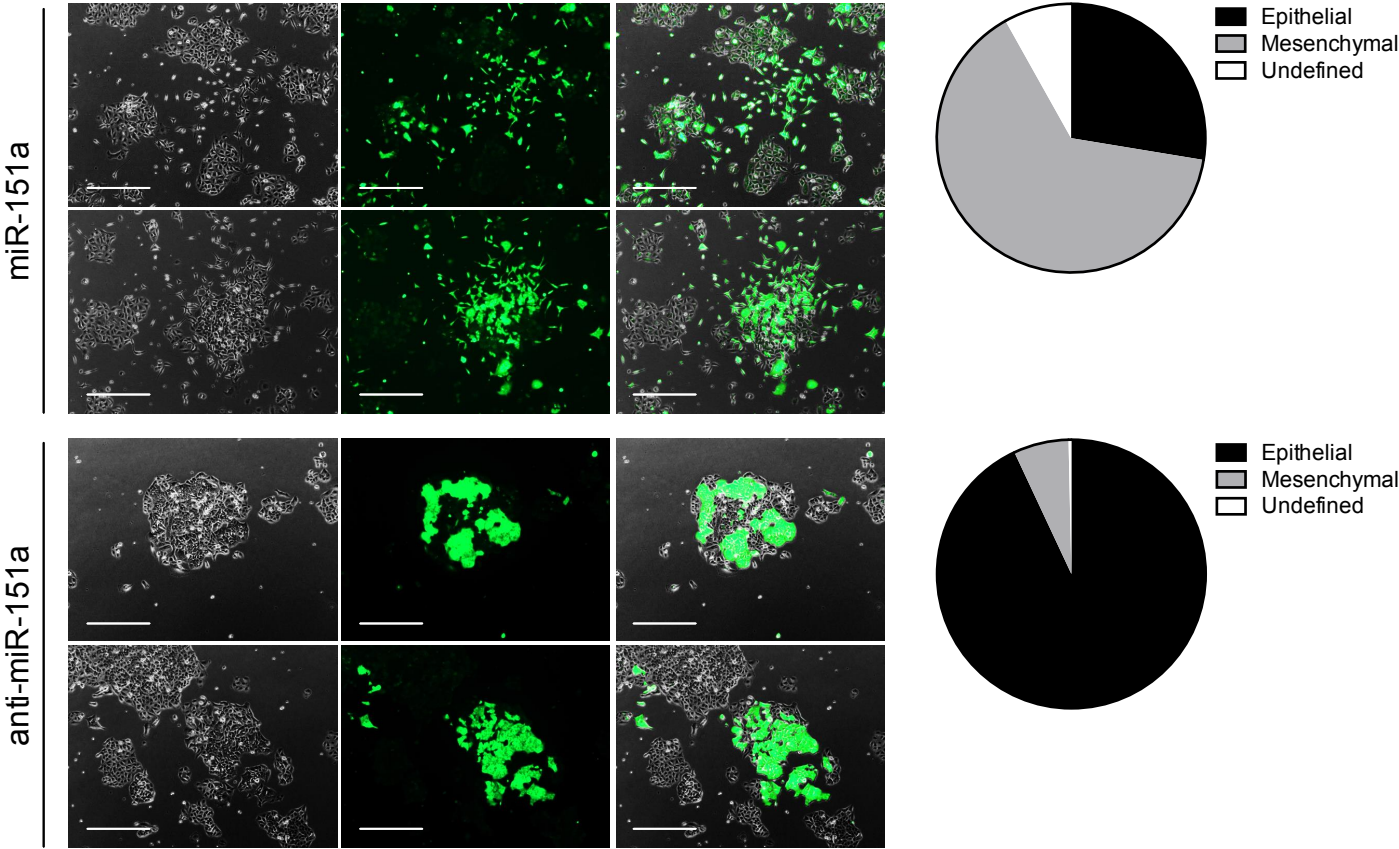

Supplement: oncsis201766x6.pdf [file oncsis201766x6.pdf]
