# Supplementary material for: miR-151a induces partial EMT by regulating E-cadherin in NSCLC cells
Source: PubMed Central journal article supplement (PMC5541717; doi:10.1038/oncsis.2017.66), 2017-07-31

**Supplementary Figure S7: miR-151a induces a mesenchymal-like phenotype in NSCLC.** Bright field and GFP images of A549 cells untreated, treated with TGF-, or stably transduced with miR-CTL, miR-151a, or anti-miR-151a. Column 1: bright field and column 2: GFP expression (Scale = 400 m).

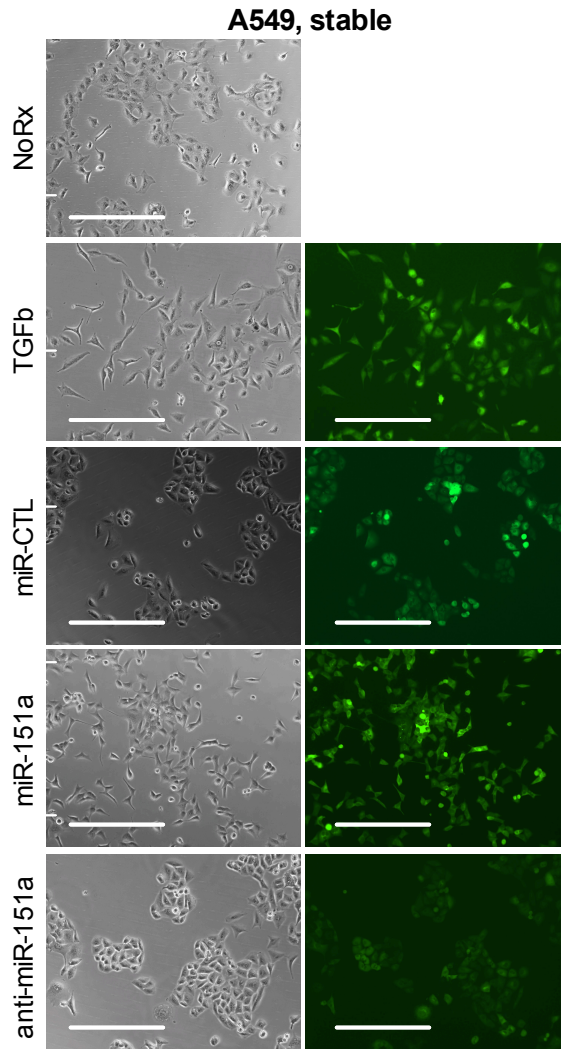

Supplement: oncsis201766x7.pdf [file oncsis201766x7.pdf]
