# Supplementary material for: miR-151a induces partial EMT by regulating E-cadherin in NSCLC cells
Source: PubMed Central journal article supplement (PMC5541717; doi:10.1038/oncsis.2017.66), 2017-07-31

**Supplementary Figure S8: Uncropped western blots.** (A) Uncropped version of immunoblot shown in Figure 5C. (B) Uncropped version and quantification of immunoblot shown in Figure 7A.

**A**

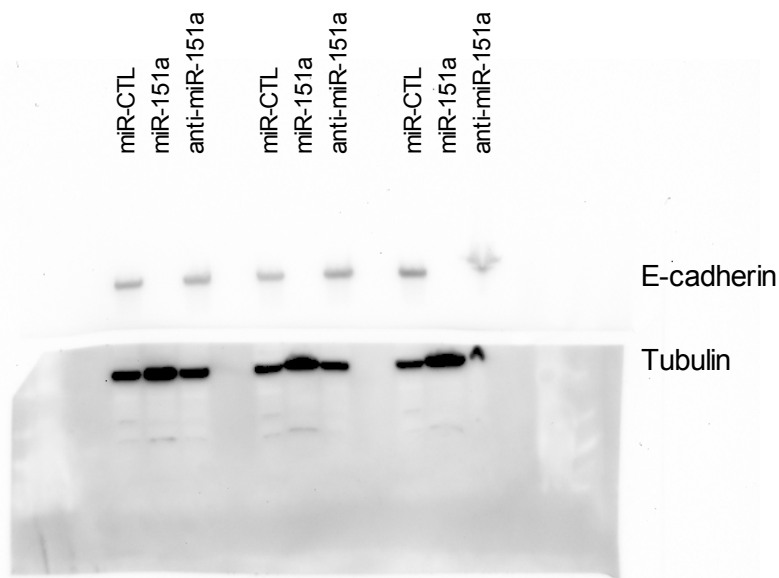

**B**

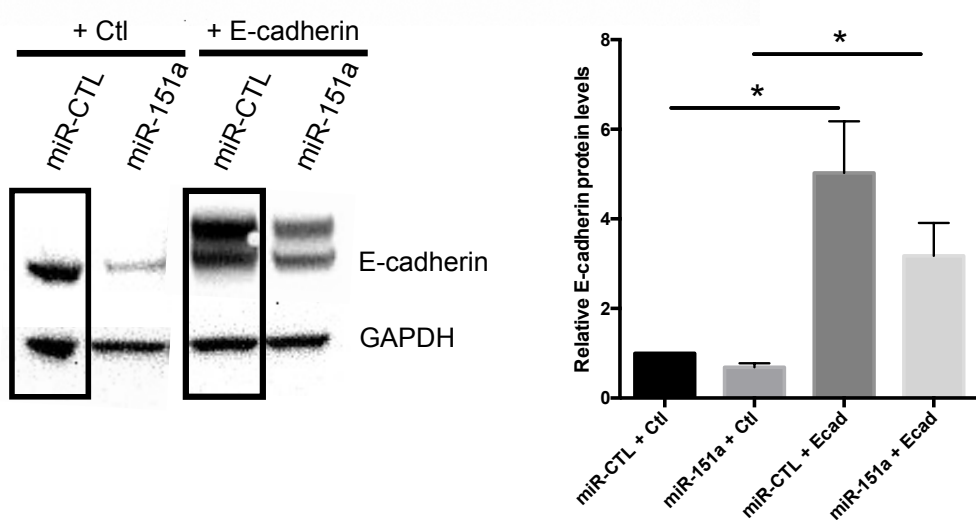

Supplement: oncsis201766x8.pdf [file oncsis201766x8.pdf]
