# Supplementary material for: miR-151a induces partial EMT by regulating E-cadherin in NSCLC cells
Source: PubMed Central journal article supplement (PMC5541717; doi:10.1038/oncsis.2017.66), 2017-07-31
Supplement: oncsis201766x9.pdf [file oncsis201766x9.pdf]

**Supplemental Figure S9: E-cadherin and miR-151a correlation and miR-151a binding site conservation in E-cadherin mRNA. (A)** The correlation between miR-151a and E-cadherin expression in NSCLC patient samples. The relative expression levels of miR-151a and E-cadherin were determined in 52 primary NSCLC samples by RT-qPCR. The potential correlation between miR-151a and E-cadherin expression was investigated by linear regression. The Line of Best Fit is indicated in black with grey dotted lines showing the 95% confidence interval ( $p=0.156$ ,  $R^2 = 0.0398$ ). **(B)** mRNA sequence alignment of Homo sapiens (Z13009), Mouse (X06115), Leopard (XM\_019455447), Gorilla (XM\_004057872), Giant Panda (XM\_002923207), and Cat (XM\_003998189) as well as hsa-miR-151a (seed sequence, motif 1 to 3). Blue indicates homology between  $n \geq 5$ , green represents homology between  $n \geq 4$  and orange represents homology between  $n \geq 3$  species.

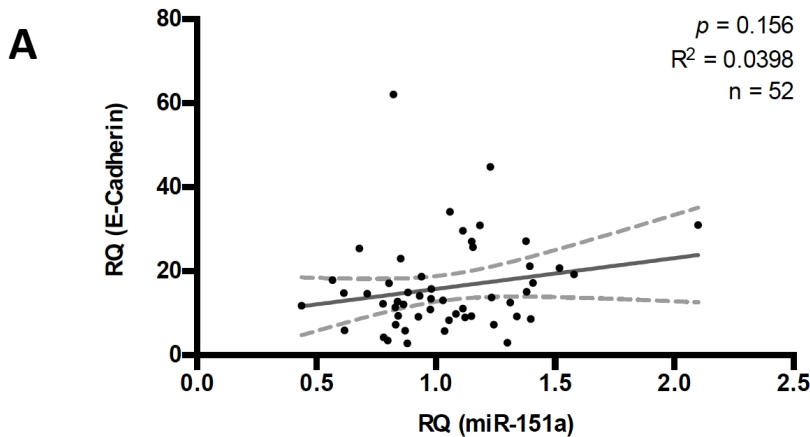

**B**

|                    |        |                                                |                           |
|--------------------|--------|------------------------------------------------|---------------------------|
| Cat                | (149)  | CUCCUGCUGCUGCUACAGGU                           | CGCAUCAGGGCUCUGCCAGGAGCC  |
| Giant panda        | (164)  | CUCCUGCUGCUGCUACAGGU                           | CUCAUCAUGGCUAUGCCAGGAGCCG |
| Gorilla            | (216)  | CUGCUGCUGCUGCUGCAGGU                           | UUCUCUUGGCUCUGCCAGGAGCCG  |
| Leopard            | (160)  | CUCCUGCUGCUGCUACAGGU                           | CACAUCAGGGCUCUGCCAGGAGCC  |
| Mouse              | (99)   | CUCCUGCUCUGCUGCAGGU                            | CUCUCAUGGCUAUGCCAGGAGCUG  |
| Homo sapiens       | (125)  | CUGCUGCUGCUGCUGCAGGU                           | CUCUCUUGGCUCUGCCAGGAGCCG  |
| motif 1 E-Cadherin |        | -----CUCCUC-----                               |                           |
| Consensus          | (226)  | CU CUGCUGCUGCU CAGGUCUC UC UGGCUCUGCCAGGAGCC   | 271 315                   |
|                    |        |                                                |                           |
| Cat                | (512)  | GAAACCCAGACAGAAUGGCUCACAUUCCCAACUCC            | AGCAUGGUCUUAG             |
| Giant panda        | (533)  | GAAACCCAGACAGAAUGGCUCACAUUCCCAACUCC            | CAGCGUGGUCUCAG            |
| Gorilla            | (585)  | GGAAUCCAAGCAGAAUUGCUCACAUUCCCAACUCC            | UUCUCUGGCCUCAG            |
| Leopard            | (523)  | GAAACCCAGACAGAAUGGCUCACAUUCCCAACUCC            | CAGCAUGGUCUUAG            |
| Mouse              | (474)  | GAAUCCAACCAGAGCUGCUC AUGUUCCCAAGCGUG           | UACCCAGGUCUCAG            |
| Homo sapiens       | (494)  | GGAAUCCAAGCAGAAUUGCUCACAUUCCCAACUCC            | UUCUCUGGCCUCAG            |
| motif 2 E-Cadherin |        | -----CUCCUC-----                               |                           |
| Consensus          | (601)  | G AA CCA CAGAA UGCUCACAUUCCCAACUCC C UGG CU AG | 651 700                   |
|                    |        |                                                |                           |
| Cat                | (2657) | UUAACUCCUCGGAUACAGACC                          | GAGAU CAGGACUAUGACUACCUG  |
| Giant panda        | (2678) | UUGAACUCCUCA GAGUCAGACC                        | AAGACCAGGACUAUGACUACCUG   |
| Gorilla            | (2727) | CUGAACUCCUCA GAGUCAGACA                        | AAGACCAGGACUAUGACUACUUG   |
| Mouse              | (2616) | CUGAACUCCUCUGAGUCGGAUC                         | CAGGACCAGGACUACGAUUAUCUG  |
| Leopard            | (2668) | UUAACUCCUCGGAUACAGACC                          | GAGAU CAGGACUAUGACUACCUG  |
| Homo sapiens       | (2636) | CUGAACUCCUCA GAGUCAGACA                        | AAGACCAGGACUAUGACUACUUG   |
| motif 3 E-Cadherin |        | -----CUCCUC-----                               |                           |
| Consensus          | (2746) | UGAACUCCUC GAGUCAGAC AGA CAGGACUAUGACUAC UG    | 2791 2835                 |

Homology between species  $\geq 5$   
 Homology between species  $\geq 4$   
 Homology between species  $\geq 3$
