# Supplementary material for: miR-151a induces partial EMT by regulating E-cadherin in NSCLC cells
Source: PubMed Central journal article supplement (PMC5541717; doi:10.1038/oncsis.2017.66), 2017-07-31
Supplement: oncsis201766x10.pdf [file oncsis201766x10.pdf]

## SUPPLEMENTARY TABLES

**Supplementary Table S1: Clinical characteristics for the NSCLC cohort.** Formalin-fixed, paraffin embedded (FFPE) surgical resections from 52 lung adenocarcinoma (LAC) patients were included in this study. The material includes 52 primary lung adenocarcinomas and 26 paired distant metastases (22 brain and 4 adrenal gland). Tumor-adjacent, normal lung tissue from 10 patients was included as controls.

| <b>Clinical Characteristics</b>      | <b>NSCLC Cohort</b> |
|--------------------------------------|---------------------|
| <b>Patients (n)</b>                  |                     |
| Cases                                | 52                  |
| Cases with paired distant metastases | 24                  |
| <b>Histological subtype (n)</b>      |                     |
| Adenocarcinoma                       | 52                  |
| Squamous cell carcinoma              | 0                   |
| Adenosquamous cell carcinoma         | 0                   |
| Large cell carcinoma                 | 0                   |
| Sarcomatoid carcinoma                | 0                   |
| <b>Gender (n (%))</b>                |                     |
| Male                                 | 22 (42.3%)          |
| Female                               | 30 (57.7%)          |
| <b>Age (years)</b>                   |                     |
| Min-Max (Average)                    | 38-76 (61.7)        |
| <b>TNM Classification (n (%))</b>    |                     |
| T1                                   | 18 (34.7%)          |
| T2                                   | 32 (61.5%)          |
| T3                                   | 0 (0%)              |
| T4                                   | 1 (1.9%)            |
| T Unknown                            | 1 (1.9%)            |
| <b>N</b>                             |                     |
| N0                                   | 33 (63.5%)          |
| N1                                   | 8 (15.4%)           |
| N2                                   | 9 (17.3%)           |
| N3                                   | 0 (0%)              |
| N Unknown                            | 2 (3.8%)            |
| <b>M</b>                             |                     |
| M0                                   | 26 (50.0%)          |
| M1                                   | 26 (50.0%)          |
| <b>Smoking status (n (%))</b>        |                     |
| Current Smoker                       | 34 (65.4%)          |
| Previous Smoker                      | 16 (30.8%)          |
| Unknown                              | 2 (3.8%)            |
| <b>Tumor content (%)</b>             |                     |
| Tumors, Min-Max (Average)            | 5-80% (33.2%)       |
| Metastases, Min-Max (Average)        | 5-90% (68.7%)       |
